# Supplementary material
Source: publisher site journal article supplement (http://kjim.org/upload/media/kjim-2020-559-suppl6.pdf)
Supplement: Supplementary file 1 [file kjim-2020-559-suppl6.pdf]

**Supplementary Table 6. Comparison of FVC and DL<sub>CO</sub> decline rate according to baseline GAP stage**

| Parameter                                                                      | Time           | Baseline GAP I (n = 95 <sup>a</sup> or 90 <sup>b</sup> ) |                |         | Baseline GAP II–III (n = 76 <sup>a</sup> or 72 <sup>b</sup> ) |                 |         |
|--------------------------------------------------------------------------------|----------------|----------------------------------------------------------|----------------|---------|---------------------------------------------------------------|-----------------|---------|
|                                                                                |                | Mean                                                     | 95% CI         | p value | Mean                                                          | 95% CI          | p value |
| Δ FVC/year <sup>c</sup> (n = 171)                                              | Pre-treatment  | -4.56                                                    | -6.10 to -3.02 |         | -6.40                                                         | -8.38 to -4.42  |         |
|                                                                                | Post-treatment | -2.28                                                    | -3.21 to -1.35 |         | -3.72                                                         | -4.97 to -2.48  |         |
|                                                                                | Difference     | 2.28                                                     |                | < 0.001 | 2.68                                                          |                 | < 0.001 |
| p value for homogeneity of difference in parameter between two groups: 0.626   |                |                                                          |                |         |                                                               |                 |         |
| Δ DL <sub>CO</sub> /year <sup>c</sup> (n = 162)                                | Pre-treatment  | -4.84                                                    | -7.34 to -2.34 |         | -11.09                                                        | -13.84 to -8.34 |         |
|                                                                                | Post-treatment | -3.80                                                    | -5.03 to -2.57 |         | -3.46                                                         | -4.89 to -2.02  |         |
|                                                                                | Difference     | 1.04                                                     |                | 0.153   | 7.63                                                          |                 | < 0.001 |
| p value for homogeneity of difference in parameter between two groups: < 0.001 |                |                                                          |                |         |                                                               |                 |         |

FVC, forced vital capacity; DL<sub>CO</sub>, diffusing capacity of the lungs for carbon monoxide; GAP, Gender-Age-Physiology; CI, confidence interval.

<sup>a</sup>Δ FVC/year.

<sup>b</sup>Δ DL<sub>CO</sub>/year.

<sup>c</sup>Change in % predicted per year.
